# Supplementary material
Source: publisher site journal article supplement (https://static.cambridge.org/content/id/urn:cambridge.org:id:article:S0032247419000299/resource/name/S0032247419000299supp001.docx)
Supplement: Supplementary file 1 [file S0032247419000299supp001.docx]

Supplementary material to the article *Environmental Encounters: Wholly Mammoth, Indigenous Communities and Metropolitan Scientists in the Soviet Arctic* by Dmitry V. Arzyutov.

**Archival collections**

AMAĖ RAN – Archive of Peter the Great Museum of Anthropology and Ethnography of Russian Academy of Sciences, Saint Petersburg, Russia.

AMAĖ RAN 6/1/5: Prokof'ev, Georgiĭ N. *Polevoĭ dnevnik*. I͡Anov Stan. 1925/26. 58 folios.

ARAN – Archive of the Russian Academy of Sciences, Moscow, Russia.

ARAN 277/3/28: [Gekker]. *Dokladnai͡a zapiska nachal'nika ėkspedit͡sii AN SSSR na ostrov Vrangeli͡a ob organizat͡sii ėtoĭ ėkspedit͡sii*. 27 March 1938. 1 folio.

ARAN 534/1/42: *Delo po organizat͡sii issledovaniĭ Taĭmyrskogo mamonta*. 1948-1949. 35 folios.

ARAN 564/1/1: *Osnovnye dokumenty po organizat͡sii ėkspedit͡sii*. 25 October 1937 – 27 June 1938. 79 folios.

ARAN 564/1/2: *Glavsevmorput'. Perepiska. Dokumenty po ėkspedit͡sii*. 28 October 1937 – 26 November 1938. 36 folios.

ARAN 564/1/3: *Instrukt͡sii, kadry, programmy*. 20 December 1937 – 9 August 1938. 130 folios.

ARAN 564/1/5: *Stenogramma soveshchanii͡a*. 7 February – 8 February 1938. 102 folios.

ARAN 564/1/6: *Perepiska s zhelai͡ushchimi prini͡at' uchastie v rabote ėkspedit͡sii. Vyrezki iz gazet*. 29 October 1937 – 10 June 1938. 101 folios.

ARAN 1509/1/534: *Tematiko-ėkspozit͡sionnyĭ plan vystavki “Mir mamonta” (I͡Aponii͡a)*. 1982. 91 folios.

ARAN 1677/1/212: *Protokoly i otchety komissiĭ, stat'i i perepiska o provedenii issledovaniĭ po izuchenii͡u trupov mamontov, obnaruzhennykh v Susumanskom raĭone Magadanskoĭ oblasti i na Gydanskom poluostrove*. 12 July 1977 – 29 September 1983. 233 folios.

GARF – The State Archive of Russian Federation, Moscow, Russia

GARF 5446/22/1181: *Delo № UD 215-66 Ob organizat͡sii ėkspedit͡sii na o. Vrangeli͡a dli͡a perevozki trupa mamonta*. 25 January – 8 June 1938. 25 January – 8 June 1938. 19 folios.

ORKP NB TGU – Department of Rare and Unique Books of the Scientific Library at Tomsk State University, Russia, Tomsk.

ORKP NB TGU5/1/34: Kostrov, Nikolaĭ A. *Skazanii͡a tomskikh samoedov o mamontakh*. 1877-1881. 12 folios.

RGASPI – Russian State Archive of Social and Political History, Moscow, Russia.

RGASPI 558/11/1428 – *Prilozhenie k zapiske Georgii͡a Maksimilianovicha Malenkova.* 1950. 34 folios.

SPF ARAN – Saint Petersburg Branch of the Archive of Russian Academy of Sciences, Saint Petersburg, Russia.

SPF ARAN 55/1(1948)/7: *Perepiska po ėkspedit͡sii i komandirovkam [Zoologicheskiĭ institut AN SSSR]*. 1 January 1948 – 31 December 1948. 248 folios.

SPF ARAN 282/1/169: Prokof'ev, Georgiĭ N. *Samodiĭskie i͡azyki i problema proiskhozhdenii͡a sovremennykh narodnosteĭ samodiĭskoĭ gruppy – nent͡sev, nganasanov, ėnt͡sev i sel'kupov (Tezisy doklada na Otdelenii Obshchestvennykh Nauk AN SSSR ot Instituta Ėtnografii Akademii Nauk sovmestno s Institutom I͡Azyka i Myshlenii͡a imeni N.I͡A. Marra)*. The 1930s. 6 folios.

SPF ARAN 849/1/628: Zelenin Dmitriĭ K. *Proiskhozhdenie slova “mamont” (pis'mo v redakt͡sii͡u)*. 17 June 1953. 19 folios.

**Museum collections**

MAĖ – [Numbered Collections of] Peter the Great Museum of Anthropology and Ethnography of Russian Academy of Sciences, Saint Petersburg, Russia.

MAE 1418-55: *Fotootpechatok. Torgovli͡a mamontovoĭ kost'i͡u v I͡Akutske. I͡Akuty, russkie. I͡Akutii͡a (Sakha), g. I͡Akutsk, vtorai͡a polovina XIX v.* 22,0х14,0. Author: Cherskiĭ, Ivan Dement'evich (1845-1892) (?) (<http://collection.kunstkamera.ru/entity/OBJECT/102617?query=1418-55&index=0>).

I͡AGOM – Emelian I͡Aroslavskiĭ I͡Akutsk State United Museum of History and Culture of the Peoples of the North, I͡Akutsk, Russia.

YaGOM No 41405/SF1-426: *The mammoth bowl (choron) made by the I͡Akutian carvener Terentiĭ V. Ammosov (1912-1988)*. 1976. (<http://www.museum.ru/C6410>)

I͡ANOVK - I͡Amal-Nenets Regional Exhibition Complex Named after Irinarkh Shemanovskiĭ, Salekhard, Russia

I͡ANOVK 4900/1-3 – The reindeer gear made out mammoth skin. 2000s.

ZIN – Zoological Museum of Russian Academy of Sciences, St Petersburg, Russia

ZIN No 27101: *The skeleton of Taĭmyr mammoth*, 1948

ZIN No 70188: *The mummy of Magadan (Kirgili͡akh) mammoth (Dima)*, 1977
